# Supplementary material for: Magnetic Resonance Imaging‐Guided Delivery of Neural Stem Cells into the Basal Ganglia of Nonhuman Primates Reveals a Pulsatile Mode of Cell Dispersion
Source: PubMed Central journal article supplement (PMC5442780; doi:10.5966/sctm.2016-0269), 2016-09-22
Supplement: SCT3-6-0877-s001.pdf [file SCT3-6-0877-s001.pdf]

## **Video Legends – Daadi et al.**

**Video 1.** Real-time MR imaging of SPIO-labeled NSC injection into agarose gel phantom at a rate of 1  $\mu\text{L}/\text{min}$

**Video 2.** Real-time MR imaging of SPIO-labeled NSC injection into agarose gel phantom at a rate of 5  $\mu\text{L}/\text{min}$

**Video 3.** Real-time MR imaging of SPIO-labeled NSC injection into brain parenchyma of baboon at a rate of 1  $\mu\text{L}/\text{min}$
